# Supplementary material
Source: PubMed Central journal article supplement (PMC4086855)
Supplement: NIHMS597083-supplement-02.pdf [file NIHMS597083-supplement-02.pdf]

## Supplemental Tables

Table S1. Composition of Axis I Disorders in the Major Depressive Disorder (MDD) Group and the Other Psychiatric Control Group. (n = 64)

| Axis I disorders                  | MDD<br>(n = 42)    | Other psychiatric<br>(n = 22) | $\chi^2$       |
|-----------------------------------|--------------------|-------------------------------|----------------|
| ADHD                              | 17 (40.5%)         | 5 (22.7%)                     | 2.02           |
| ODD                               | 20 (47.6%)         | 7 (31.8%)                     | 1.48           |
| CD                                | 12 (28.6%)         | 4 (18.2%)                     | 0.83           |
| PTSD                              | 8 (19.0%)          | 2 (9.1%)                      | 1.09           |
| Anxiety disorders except for PTSD | 26 (61.9%)         | 14 (63.6%)                    | 0.02           |
| GAD                               | 16 (38.1%)         | 8 (36.4%)                     | 0.02           |
| Separation anxiety                | 17 (40.5%)         | 7 (31.8%)                     | 0.46           |
| Panic attack                      | 1 (2.4%)           | 0 (0.0%)                      | 0.52           |
| Agoraphobia                       | 0 (0.0%)           | 1 (4.5%)                      | 1.98           |
| Social phobia                     | 7 (16.7%)          | 5 (22.7%)                     | 0.35           |
| OCD                               | 2 (4.8%)           | 3 (13.6%)                     | 1.66           |
| <b>MDD</b>                        | <b>42 (100.0%)</b> | <b>0 (0.0%)</b>               | <b>64.00**</b> |

Note: Some subjects showed co-morbidity. ADHD = attention-deficit/hyperactivity Disorder; CD = conduct disorder; GAD = generalized anxiety disorder; OCD = obsessive-compulsive disorder; ODD = oppositional defiant disorder; PTSD = posttraumatic stress disorder.

\*\* $p < .01$

Table S2. Whole Brain Analysis of Stressful Life Events: Blood Oxygen Level-Dependent (BOLD) Responses to Emotional Faces. (N = 115)

| Brain region                                                                     | Regression Coefficient |             |         |          | Talairach Coordinate |     |     | Cluster Size |
|----------------------------------------------------------------------------------|------------------------|-------------|---------|----------|----------------------|-----|-----|--------------|
|                                                                                  | <i>B</i>               | <i>SE B</i> | $\beta$ | <i>t</i> | X                    | Y   | Z   |              |
| <b>Outcome Variable: Fearful &gt; Neutral</b>                                    |                        |             |         |          |                      |     |     |              |
| <b>Predictor Variable: Main Effect of Cumulative Stressful Life Events (SLE)</b> |                        |             |         |          |                      |     |     |              |
| L DEC (BA34)                                                                     | .050                   | .010        | .618    | 5.18**   | -16                  | -5  | -22 | 20           |
| L Superior TG (BA38)                                                             | .052                   | .009        | .639    | 5.64**   | -35                  | 16  | -28 | 61           |
| L Middle TG (BA21)                                                               | .049                   | .010        | .602    | 4.99**   | -47                  | 6   | -29 | 30           |
| L Cuneus (BA18)                                                                  | .009                   | .002        | .490    | 3.90**   | -15                  | -79 | 29  | 23           |
| L Pons                                                                           | .022                   | .004        | .610    | 5.11**   | -5                   | -20 | -22 | 18           |
| R Thalamus                                                                       | .015                   | .003        | .539    | 4.31**   | 15                   | -8  | 5   | 17           |
| R Superior TG (BA38)                                                             | -.085                  | .018        | -.536   | 4.65**   | 37                   | 14  | -31 | 30           |
| R Middle TG (BA39)                                                               | .011                   | .003        | .510    | 4.08**   | 37                   | -67 | 29  | 24           |
| R Middle TG (BA22)                                                               | .014                   | .004        | .502    | 4.04**   | 54                   | -33 | 5   | 35           |
| R Middle TG                                                                      | .010                   | .002        | .490    | 3.87**   | 43                   | -43 | 4   | 44           |
| R Inferior TG (BA20)                                                             | .039                   | .007        | .644    | 5.59**   | 47                   | -7  | -22 | 112          |
| R Cuneus (BA19)                                                                  | .015                   | .003        | .565    | 4.60**   | 11                   | -88 | 24  | 74           |
| R Red Nucleus                                                                    | .030                   | .005        | .670    | 5.73**   | 3                    | -18 | -10 | 63           |
| R Cerebellum (Tonsil)                                                            | .045                   | .009        | .592    | 4.84**   | 44                   | -57 | -46 | 39           |
| <b>Predictor Variable: Main Effect of MDD Status (MDD)</b>                       |                        |             |         |          |                      |     |     |              |
| <b>No Main Effect</b>                                                            |                        |             |         |          |                      |     |     |              |
| <b>Predictor Variable: Main Effect of Other Psychiatric Control Status (OPC)</b> |                        |             |         |          |                      |     |     |              |
| R Superior TG (BA38)                                                             | 1.388                  | .315        | .693    | 4.41**   | 37                   | 10  | -32 | 59           |
| R Inferior TG (BA20)                                                             | -.291                  | .068        | -.671   | 4.31**   | 46                   | -9  | -16 | 25           |
| R Inferior TG (BA20)                                                             | -1.724                 | .336        | -.781   | 5.14**   | 62                   | -24 | -24 | 20           |
| R Precuneus (BA7)                                                                | -.533                  | .137        | -.626   | 3.89**   | 6                    | -78 | 39  | 23           |
| <b>Predictor Variable: Interaction of SLE x MDD</b>                              |                        |             |         |          |                      |     |     |              |
| <b>No Interaction Effect</b>                                                     |                        |             |         |          |                      |     |     |              |
| <b>Predictor Variable: Interaction of SLE x OPC</b>                              |                        |             |         |          |                      |     |     |              |
| L Superior TG (BA38)                                                             | .093                   | .019        | .899    | 4.99**   | -37                  | 17  | -25 | 33           |
| L Middle TG (BA21)                                                               | .111                   | .026        | .806    | 4.30**   | -48                  | 6   | -32 | 18           |
| R DEC (BA34)                                                                     | -.198                  | .035        | -1.034  | 5.67**   | 13                   | 4   | -16 | 18           |
| R Superior TG (BA38)                                                             | -.160                  | .033        | -.873   | 4.84**   | 37                   | 12  | -31 | 48           |
| R Middle TG (BA22)                                                               | .033                   | .008        | .834    | 4.33**   | 57                   | -33 | 5   | 49           |
| R Inferior TG (BA20)                                                             | .179                   | .034        | .978    | 5.35**   | 60                   | -25 | -24 | 36           |
| R Inferior TG (BA20)                                                             | .037                   | .007        | .968    | 5.35**   | 47                   | -9  | -18 | 78           |
| R Postcentral Gyrus (BA7)                                                        | .054                   | .014        | .685    | 3.79**   | 26                   | -48 | 66  | 18           |
| R Inferior PL (BA40)                                                             | .019                   | .005        | .764    | 4.05**   | 22                   | -37 | 53  | 43           |
| R Middle OG (BA19)                                                               | .042                   | .010        | .789    | 4.17**   | 8                    | -81 | 32  | 80           |
| Pons                                                                             | .060                   | .013        | .864    | 4.58**   | 0                    | -17 | -25 | 17           |

(Continue)

(Continued)

| Brain region | Regression Coefficient |             |         |          | Talairach Coordinate |   |   | Cluster Size |
|--------------|------------------------|-------------|---------|----------|----------------------|---|---|--------------|
|              | <i>B</i>               | <i>SE B</i> | $\beta$ | <i>t</i> | X                    | Y | Z |              |

Outcome Variable: **Sad > Neutral**Predictor Variable: **Main Effect of Cumulative SLE**

|                      |       |      |       |        |     |     |     |     |
|----------------------|-------|------|-------|--------|-----|-----|-----|-----|
| L Lateral GP         | .035  | .007 | .566  | 4.64** | -19 | -16 | -8  | 53  |
| L Superior TG (BA38) | .069  | .014 | .587  | 4.96** | -35 | 17  | -28 | 48  |
| R Superior TG (BA38) | -.074 | .013 | -.618 | 5.50** | 33  | 6   | -33 | 118 |
| R Middle TG (BA21)   | .014  | .006 | .702  | 6.61** | 47  | -5  | -18 | 392 |
| R Middle TG (BA22)   | .015  | .003 | .567  | 4.61** | 55  | -34 | 5   | 57  |
| R Inferior PL (BA40) | .014  | .002 | .732  | 6.44** | 52  | -51 | 23  | 94  |

Predictor Variable: **Main Effect of MDD**

|                      |       |      |       |        |     |     |    |    |
|----------------------|-------|------|-------|--------|-----|-----|----|----|
| L Precuneus (BA7)    | .460  | .120 | .697  | 3.82** | -21 | -73 | 49 | 21 |
| R Superior TG (BA39) | -.230 | .052 | -.771 | 4.41** | 46  | -59 | 19 | 38 |

Predictor Variable: **Main Effect of OPC**

|                         |        |      |       |        |     |     |     |     |
|-------------------------|--------|------|-------|--------|-----|-----|-----|-----|
| L Perigenual ACC (BA32) | -.417  | .095 | -.713 | 4.37** | -10 | 42  | 1   | 30  |
| R Superior TG (BA38)    | 1.242  | .299 | .621  | 4.16** | 34  | 6   | -32 | 52  |
| R Superior TG (BA22)    | -.278  | .065 | -.695 | 4.32** | 50  | -38 | 7   | 28  |
| R Middle TG (BA21)      | -.656  | .118 | -.757 | 5.56** | 52  | -9  | -16 | 150 |
| R Cerebellum (Uvula)    | -1.724 | .436 | -.651 | 3.96** | 30  | -89 | -22 | 17  |

Predictor Variable: **Interaction of SLE x MDD****No Interaction Effect**Predictor Variable: **Interaction of SLE x OPC**

|                      |       |      |       |        |     |     |     |     |
|----------------------|-------|------|-------|--------|-----|-----|-----|-----|
| L Medial GP          | .071  | .017 | .802  | 4.24** | -18 | -14 | -7  | 33  |
| L Superior TG (BA38) | .129  | .026 | .902  | 4.90** | -38 | 15  | -28 | 71  |
| L Mammillary Body    | -.118 | .025 | -.885 | 4.81** | 0   | -10 | -8  | 19  |
| R Superior TG (BA38) | -.156 | .028 | -.982 | 5.63** | 33  | 7   | -34 | 130 |
| R Middle TG (BA22)   | .027  | .007 | .736  | 3.87** | 52  | -35 | 5   | 18  |
| R Inferior TG (BA20) | .084  | .012 | 1.131 | 6.86** | 49  | -6  | -18 | 452 |

Outcome Variable: **Happy > Neutral**Predictor Variable: **Main Effect of Cumulative SLE**

|                            |       |      |       |        |     |     |     |     |
|----------------------------|-------|------|-------|--------|-----|-----|-----|-----|
| L PRC (BA35)               | .035  | .007 | .587  | 4.94** | -21 | -24 | -22 | 17  |
| L Ventral ACC (BA24)       | .014  | .004 | .502  | 3.97** | -3  | -19 | 39  | 22  |
| L Substantia Nigra         | .033  | .005 | .760  | 6.87** | -8  | -19 | -8  | 168 |
| L Superior TG (BA38)       | .081  | .013 | .695  | 6.24** | -36 | 14  | -27 | 198 |
| L Middle TG (BA21)         | -.065 | .014 | -.530 | 4.52** | -40 | -1  | -32 | 40  |
| L Postcentral Gyrus (BA43) | .027  | .005 | .598  | 4.91** | -59 | -8  | 14  | 26  |
| L Precuneus (BA19)         | .026  | .006 | .540  | 4.39** | -38 | -75 | 39  | 35  |
| L Cerebellum (Declive)     | .011  | .002 | .539  | 4.31** | -7  | -55 | -13 | 37  |
| R Ventral ACC (BA24)       | .010  | .002 | .534  | 4.41** | 11  | 2   | 28  | 21  |

(Continue)

(Continued)

| Brain region                                             | Regression Coefficient |             |         |          | Talairach Coordinate |     |     | Cluster Size |
|----------------------------------------------------------|------------------------|-------------|---------|----------|----------------------|-----|-----|--------------|
|                                                          | <i>B</i>               | <i>SE B</i> | $\beta$ | <i>t</i> | X                    | Y   | Z   |              |
| <b>Predictor Variable: Main Effect of Cumulative SLE</b> |                        |             |         |          |                      |     |     |              |
| R Dorsal PCC (BA31)                                      | .014                   | .004        | .448    | 3.52**   | 2                    | -50 | 32  | 24           |
| R Ventral Lateral Thalamus                               | .015                   | .003        | .581    | 4.77**   | 14                   | -9  | 5   | 17           |
| R OFC (BA11)                                             | .171                   | .029        | .648    | 5.79**   | 5                    | 11  | -22 | 17           |
| R Superior TG (BA22)                                     | .012                   | .003        | .565    | 4.63**   | 48                   | -35 | 1   | 116          |
| R Superior TG (BA39)                                     | .031                   | .005        | .677    | 5.82**   | 58                   | -59 | 19  | 61           |
| R Middle TG (BA21)                                       | .032                   | .005        | .692    | 6.29**   | 48                   | -11 | -15 | 555          |
| R Middle TG (BA21)                                       | .090                   | .017        | .602    | 5.41**   | 48                   | 11  | -33 | 22           |
| R Inferior PL (BA40)                                     | .012                   | .003        | .571    | 4.62**   | 49                   | -46 | 25  | 67           |
| R Middle OG (BA19)                                       | .029                   | .006        | .555    | 4.47**   | 52                   | -74 | 5   | 21           |

Predictor Variable: **Main Effect of MDD**  
**No Main Effect**

| <b>Predictor Variable: Main Effect of OPC</b> |        |      |       |        |     |     |     |     |
|-----------------------------------------------|--------|------|-------|--------|-----|-----|-----|-----|
| L Superior TG (BA38)                          | -1.616 | .431 | -.586 | 3.75** | -33 | 11  | -33 | 34  |
| L Middle TG (BA21)                            | -1.189 | .257 | -.697 | 4.62** | -51 | 7   | -31 | 20  |
| L Lateral Geniculum Body                      | -.507  | .127 | -.616 | 3.99** | -21 | -22 | -4  | 18  |
| L Red Nucleus                                 | -.664  | .131 | -.731 | 5.06** | 0   | -16 | -9  | 42  |
| R Subgenual ACC (BA25)                        | 2.739  | .478 | .887  | 5.73** | 14  | 15  | -17 | 24  |
| R Middle TG (BA21)                            | -.674  | .132 | -.725 | 5.11** | 49  | -10 | -16 | 214 |

Predictor Variable: **Interaction of SLE x MDD**  
**No Interaction Effect**

| <b>Predictor Variable: Interaction of SLE x OPC</b> |       |      |        |        |     |     |     |     |
|-----------------------------------------------------|-------|------|--------|--------|-----|-----|-----|-----|
| L Superior TG (BA38)                                | .162  | .029 | .954   | 5.51** | -36 | 14  | -28 | 148 |
| L Middle TG (BA21)                                  | -.109 | .025 | -.785  | 4.30** | -41 | -1  | -29 | 45  |
| L Red Nucleus                                       | .072  | .013 | .970   | 5.66** | -1  | -17 | -10 | 66  |
| R Subgenual ACC (BA25)                              | -.234 | .039 | -1.070 | 6.04** | 14  | 11  | -16 | 23  |
| R OFC (BA11)                                        | .362  | .062 | 1.008  | 5.85** | 4   | 10  | -22 | 19  |
| R Inferior FG (BA47)                                | .101  | .020 | .912   | 4.93** | 50  | 22  | -7  | 17  |
| R Superior TG (BA22)                                | .026  | .006 | .839   | 4.48** | 48  | -35 | 1   | 60  |
| R Middle TG (BA21)                                  | .193  | .035 | .955   | 5.50** | 49  | 10  | -32 | 21  |
| R Inferior TG (BA20)                                | .072  | .011 | 1.077  | 6.37** | 49  | -12 | -16 | 557 |
| R Lingual Gyrus (BA17)                              | .026  | .007 | .756   | 3.86** | 10  | -86 | 2   | 22  |
| R Medial Geniculum Body                             | .039  | .008 | .941   | 5.05** | 18  | -25 | -1  | 21  |

Note: Threshold of  $z = 3.0$  at  $p < .0026$  and 17 voxels. Multivariate outliers were not assessed. ACC = anterior cingulate cortex; *B* = unstandardized coefficient;  $\beta$  = standardized coefficient; BA = Brodmann area; DEC = dorsal entorhinal cortex; FG = frontal gyrus; GP = globus pallidus; L = left hemisphere; OFC = orbitofrontal cortex; OG = occipital gyrus; PCC = posterior cingulate cortex; PL = parietal lobule; PRC = perirhinal cortex; R = right hemisphere; *SE B* = standard error of *B*; TG = temporal gyrus.

\* $p < .05$ ; \*\* $p < .01$

Table S3. Whole Brain Analysis of Traumatic Life Events: Blood Oxygen Level-Dependent (BOLD) Responses to Emotional Faces. (N = 115)

| Brain region                                                                     | Regression Coefficient |             |         |          | Talairach Coordinate |     |     | Cluster Size |
|----------------------------------------------------------------------------------|------------------------|-------------|---------|----------|----------------------|-----|-----|--------------|
|                                                                                  | <i>B</i>               | <i>SE B</i> | $\beta$ | <i>t</i> | X                    | Y   | Z   |              |
| <b>Outcome Variable: Fearful &gt; Neutral</b>                                    |                        |             |         |          |                      |     |     |              |
| <b>Predictor Variable: Main Effect of Cumulative Traumatic Life Events (TLE)</b> |                        |             |         |          |                      |     |     |              |
| L Medial FG (BA6)                                                                | .024                   | .006        | .587    | 4.22**   | 0                    | -21 | 52  | 24           |
| L Superior TG (BA22)                                                             | .071                   | .012        | .765    | 6.04**   | -58                  | 2   | -5  | 27           |
| L Superior TG (BA42)                                                             | .048                   | .009        | .744    | 5.65**   | -65                  | -26 | 8   | 31           |
| L Superior TG (BA38)                                                             | .072                   | .012        | .795    | 6.05**   | -39                  | 10  | -31 | 167          |
| L Middle TG (BA19)                                                               | .010                   | .003        | .521    | 3.63**   | -31                  | -63 | 14  | 17           |
| L Precentral Gyrus (BA4)                                                         | .026                   | .006        | .612    | 4.39**   | -37                  | -20 | 54  | 107          |
| L Cuneus (BA18)                                                                  | .010                   | .002        | .597    | 4.21**   | -15                  | -82 | 16  | 18           |
| L Inferior PL (BA40)                                                             | .011                   | .003        | .572    | 4.09**   | -31                  | -36 | 33  | 24           |
| L Middle OG (BA19)                                                               | .012                   | .003        | .642    | 4.53**   | -41                  | -72 | 7   | 24           |
| L Cerebellum (Anterior)                                                          | .019                   | .004        | .694    | 5.00**   | -15                  | -39 | -32 | 133          |
| L Cerebellum (Culmen)                                                            | .015                   | .004        | .545    | 3.76**   | -9                   | -54 | -13 | 29           |
| L Cerebellum (Tonsil)                                                            | .032                   | .008        | .612    | 4.31**   | -28                  | -55 | -52 | 22           |
| L Cerebellum (ISL)                                                               | -.093                  | .021        | -.646   | 4.52**   | -33                  | -78 | -48 | 37           |
| R DLPFC (BA46)                                                                   | -.037                  | .007        | -.711   | 5.16**   | 42                   | 41  | 25  | 17           |
| R Superior TG (BA38)                                                             | -.105                  | .027        | -.566   | 3.94**   | 37                   | 15  | -31 | 23           |
| R Superior TG (BA41)                                                             | .013                   | .003        | .572    | 3.97**   | 43                   | -28 | 4   | 17           |
| R Superior TG (BA13)                                                             | .012                   | .003        | .579    | 4.01**   | 43                   | -46 | 13  | 28           |
| R Superior TG (BA22)                                                             | .031                   | .006        | .723    | 5.32**   | 56                   | -8  | 9   | 53           |
| R Middle TG (BA39)                                                               | .012                   | .003        | .653    | 4.62**   | 37                   | -69 | 16  | 97           |
| R Middle TG (BA22)                                                               | .024                   | .005        | .625    | 4.46**   | 59                   | -31 | 5   | 37           |
| R Inferior TG (BA20)                                                             | .066                   | .013        | .719    | 5.25**   | 45                   | -5  | -27 | 92           |
| R Postcentral Gyrus (BA3)                                                        | .026                   | .004        | .823    | 6.69**   | 29                   | -31 | 59  | 488          |
| R Inferior PL                                                                    | .016                   | .003        | .662    | 4.87**   | 46                   | -37 | 27  | 117          |
| R Cuneus (BA19)                                                                  | .027                   | .005        | .688    | 5.24**   | 10                   | -82 | 33  | 222          |
| R Lingual Gyrus (BA18)                                                           | .014                   | .004        | .547    | 3.84**   | 14                   | -80 | 1   | 20           |
| R Cerebellum (Culmen)                                                            | .021                   | .004        | .679    | 4.89**   | 14                   | -59 | -4  | 63           |
| R Cerebellum (Culmen)                                                            | .015                   | .004        | .542    | 3.75**   | 8                    | -52 | -13 | 18           |
| R Cerebellum (Tonsil)                                                            | .059                   | .011        | .724    | 5.26**   | 44                   | -56 | -46 | 33           |
| R Pons                                                                           | .056                   | .010        | .774    | 5.75**   | 2                    | -17 | -19 | 164          |
| <b>Predictor Variable: Main Effect of MDD Status (MDD)</b>                       |                        |             |         |          |                      |     |     |              |
| L Precuneus (BA7)                                                                | .471                   | .127        | .517    | 3.71**   | -7                   | -77 | 47  | 23           |
| <b>Predictor Variable: Main Effect of Other Psychiatric Control Status (OPC)</b> |                        |             |         |          |                      |     |     |              |
| L Inferior FG (BA45)                                                             | .898                   | .205        | .704    | 4.39**   | -54                  | 24  | 5   | 21           |
| L Middle TG (BA21)                                                               | -.929                  | .197        | -.701   | 4.71**   | -45                  | 6   | -29 | 54           |
| L Middle TG (BA21)                                                               | -.997                  | .190        | -.758   | 5.25**   | -57                  | 4   | -6  | 30           |
| L Precentral Gyrus (BA4)                                                         | -.303                  | .087        | -.550   | 3.50**   | -32                  | -26 | 56  | 18           |
| R Subgenual ACC (BA25)                                                           | 2.386                  | .428        | .842    | 5.57**   | 11                   | 6   | -17 | 21           |

(Continue)

(Continued)

| Brain region                                             | Regression Coefficient |             |         |          | Talairach Coordinate |     |     | Cluster Size |
|----------------------------------------------------------|------------------------|-------------|---------|----------|----------------------|-----|-----|--------------|
|                                                          | <i>B</i>               | <i>SE B</i> | $\beta$ | <i>t</i> | X                    | Y   | Z   |              |
| <b>Predictor Variable: Main Effect of OPC</b>            |                        |             |         |          |                      |     |     |              |
| <b>R Middle TG (BA38)</b>                                | 1.693                  | .451        | .617    | 3.76**   | 36                   | 6   | -36 | 25           |
| <b>R Postcentral Gyrus (BA7)</b>                         | -.583                  | .143        | -.566   | 4.07**   | 22                   | -53 | 66  | 23           |
| <b>R Postcentral Gyrus (BA5)</b>                         | -.283                  | .067        | -.600   | 4.23**   | 26                   | -38 | 59  | 48           |
| <b>R Precentral Gyrus (BA4)</b>                          | -.327                  | .091        | -.572   | 3.59**   | 34                   | -22 | 55  | 24           |
| <b>R Cuneus (BA19)</b>                                   | -.453                  | .106        | -.614   | 4.28**   | 10                   | -83 | 36  | 64           |
| <b>R Pons</b>                                            | -.679                  | .176        | -.621   | 3.85**   | 7                    | -19 | -22 | 28           |
| <b>Predictor Variable: Interaction of TLE x MDD</b>      |                        |             |         |          |                      |     |     |              |
| <b>L Superior PL (BA7)</b>                               | -.088                  | .019        | -1.200  | 4.55**   | -27                  | -61 | 58  | 22           |
| <b>Predictor Variable: Interaction of TLE x OPC</b>      |                        |             |         |          |                      |     |     |              |
| <b>L Superior TG (BA42)</b>                              | .161                   | .031        | 1.367   | 5.13**   | -66                  | -25 | 9   | 20           |
| <b>L Middle TG (BA21)</b>                                | .193                   | .036        | 1.414   | 5.30**   | -57                  | 4   | -6  | 29           |
| <b>L Precentral Gyrus (BA4)</b>                          | .057                   | .016        | 1.047   | 3.65**   | -30                  | -25 | 55  | 28           |
| <b>L Lingual Gyrus (BA18)</b>                            | .041                   | .009        | 1.338   | 4.54**   | -13                  | -80 | -1  | 42           |
| <b>L Lingual Gyrus (BA19)</b>                            | .038                   | .010        | 1.197   | 3.99**   | -27                  | -64 | 0   | 19           |
| <b>R Middle TG (BA22)</b>                                | .082                   | .018        | 1.358   | 4.71**   | 62                   | -30 | 4   | 56           |
| <b>R Postcentral Gyrus (BA7)</b>                         | .133                   | .031        | 1.056   | 4.31**   | 23                   | -50 | 68  | 31           |
| <b>R Postcentral Gyrus</b>                               | .032                   | .009        | 1.095   | 3.66**   | 27                   | -26 | 34  | 20           |
| <b>R Postcentral Gyrus (BA5)</b>                         | .090                   | .023        | 1.024   | 3.95**   | 35                   | -39 | 62  | 21           |
| <b>R Inferior PL (BA40)</b>                              | .036                   | .009        | 1.080   | 3.90**   | 21                   | -37 | 55  | 23           |
| <b>R Inferior PL (BA40)</b>                              | .057                   | .013        | 1.216   | 4.33**   | 49                   | -31 | 26  | 60           |
| <b>R Lingual Gyrus (BA19)</b>                            | .050                   | .010        | 1.409   | 4.92**   | 21                   | -62 | 2   | 91           |
| <b>R Pons</b>                                            | .479                   | .090        | 1.430   | 5.35**   | 8                    | -5  | -21 | 19           |
| <b>Outcome Variable: Sad &gt; Neutral</b>                |                        |             |         |          |                      |     |     |              |
| <b>Predictor Variable: Main Effect of Cumulative TLE</b> |                        |             |         |          |                      |     |     |              |
| <b>L Ventral ACC (BA24)</b>                              | .021                   | .005        | .593    | 4.09**   | -1                   | -7  | 34  | 21           |
| <b>L Ventral ACC (BA24)</b>                              | .035                   | .006        | .767    | 5.61**   | -1                   | 28  | -3  | 71           |
| <b>L Lateral GP</b>                                      | .046                   | .010        | .667    | 4.74**   | -20                  | -15 | -8  | 48           |
| <b>L Fusiform Gyrus (BA20)</b>                           | .137                   | .026        | .745    | 5.36**   | -58                  | -39 | -24 | 20           |
| <b>L Superior TG (BA38)</b>                              | .070                   | .013        | .736    | 5.43**   | -40                  | 12  | -28 | 137          |
| <b>L Superior TG (BA42)</b>                              | .033                   | .006        | .758    | 5.58**   | -61                  | -31 | 7   | 59           |
| <b>L Middle TG (BA39)</b>                                | .012                   | .003        | .612    | 4.31**   | -31                  | -64 | 25  | 26           |
| <b>L Angular Gyrus (BA39)</b>                            | .033                   | .007        | .656    | 4.60**   | -53                  | -64 | 31  | 28           |
| <b>L Precentral Gyrus (BA4)</b>                          | .022                   | .005        | .688    | 4.88**   | -36                  | -21 | 53  | 88           |
| <b>L Paracentral Lobule (BA6)</b>                        | .017                   | .004        | .654    | 4.58**   | -3                   | -27 | 49  | 90           |
| <b>L Superior PL (BA7)</b>                               | .047                   | .010        | .649    | 4.63**   | -27                  | -50 | 65  | 20           |
| <b>L Cerebellum (Culmen)</b>                             | .019                   | .004        | .720    | 5.22**   | -11                  | -56 | -7  | 91           |
| <b>L Cerebellum (Declive)</b>                            | .099                   | .021        | .669    | 4.70**   | -48                  | -68 | -22 | 23           |
| <b>R Superior TG (BA22)</b>                              | .041                   | .005        | 1.020   | 8.76**   | 49                   | -19 | -2  | 769          |

(Continue)

(Continued)

| Brain region                                                     | Regression Coefficient |             |         |          | Talairach Coordinate |     |     | Cluster Size |
|------------------------------------------------------------------|------------------------|-------------|---------|----------|----------------------|-----|-----|--------------|
|                                                                  | <i>B</i>               | <i>SE B</i> | $\beta$ | <i>t</i> | X                    | Y   | Z   |              |
| <b>Predictor Variable: Main Effect of Cumulative TLE</b>         |                        |             |         |          |                      |     |     |              |
| R Middle TG (BA39)                                               | .014                   | .003        | .703    | 4.99**   | 39                   | -71 | 15  | 160          |
| R Inferior TG (BA20)                                             | -.077                  | .016        | -.663   | 4.70**   | 31                   | 1   | -32 | 65           |
| R Precentral Gyrus (BA6)                                         | .023                   | .005        | .691    | 4.91**   | 35                   | -6  | 55  | 115          |
| R Postcentral Gyrus (BA5)                                        | .118                   | .027        | .620    | 4.43**   | 1                    | -48 | 70  | 23           |
| R Postcentral Gyrus (BA5)                                        | .032                   | .005        | .878    | 6.82**   | 22                   | -43 | 64  | 285          |
| R Precuneus (BA31)                                               | .015                   | .004        | .569    | 3.93**   | 8                    | -52 | 34  | 43           |
| R Cuneus (BA19)                                                  | .032                   | .006        | .776    | 5.72**   | 5                    | -86 | 26  | 514          |
| R Cerebellum (Culmen)                                            | .022                   | .005        | .652    | 4.56**   | 13                   | -63 | -5  | 30           |
| R Cerebellum (Declive)                                           | .087                   | .018        | .665    | 4.87**   | 25                   | -89 | -20 | 34           |
| R Cerebellum (Tonsil)                                            | .052                   | .011        | .667    | 4.75**   | 47                   | -53 | -43 | 29           |
| <b>Predictor Variable: Main Effect of MDD<br/>No Main Effect</b> |                        |             |         |          |                      |     |     |              |
| <b>Predictor Variable: Main Effect of OPC</b>                    |                        |             |         |          |                      |     |     |              |
| L Perigenual ACC (BA32)                                          | -.470                  | .090        | -.815   | 5.23**   | 0                    | 41  | 4   | 93           |
| L Anterior PFC (BA10)                                            | -.244                  | .063        | -.636   | 3.90**   | -13                  | 43  | 13  | 29           |
| L Inferior FG (BA47)                                             | -.649                  | .131        | -.776   | 4.96**   | -42                  | 13  | -11 | 27           |
| L Superior TG (BA38)                                             | -1.046                 | .252        | -.639   | 4.15**   | -41                  | 13  | -31 | 46           |
| L Superior TG (BA42)                                             | -.665                  | .148        | -.685   | 4.50**   | -65                  | -28 | 8   | 17           |
| L Middle TG (BA39)                                               | -.201                  | .049        | -.657   | 4.12**   | -31                  | -65 | 26  | 22           |
| L Middle TG (BA21)                                               | -.716                  | .123        | -.880   | 5.83**   | -57                  | -3  | -13 | 81           |
| L Cuneus (BA18)                                                  | -.194                  | .047        | -.639   | 4.11**   | -13                  | -85 | 18  | 23           |
| R Amygdala                                                       | -.848                  | .155        | -.792   | 5.47**   | 29                   | 0   | -17 | 53           |
| R Caudate Head                                                   | -.464                  | .092        | -.794   | 5.02**   | 1                    | 14  | 4   | 64           |
| R Superior TG (BA22)                                             | -.287                  | .059        | -.746   | 4.85**   | 53                   | -29 | 6   | 71           |
| R Middle TG (BA21)                                               | -.400                  | .088        | -.657   | 4.57**   | 56                   | -8  | -13 | 28           |
| R Postcentral Gyrus (BA7)                                        | -1.180                 | .241        | -.751   | 4.90**   | 17                   | -46 | 69  | 151          |
| R Cuneus (BA17)                                                  | -.304                  | .079        | -.626   | 3.86**   | 9                    | -91 | 4   | 20           |
| R Cuneus (BA19)                                                  | -.578                  | .116        | -.754   | 5.00**   | 12                   | -84 | 35  | 185          |
| R Middle OG (BA19)                                               | -.206                  | .051        | -.639   | 4.02**   | 36                   | -74 | 14  | 25           |
| R Cerebellum (Declive)                                           | -1.588                 | .311        | -.787   | 5.11**   | 26                   | -89 | -19 | 47           |
| <b>Predictor Variable: Interaction of TLE x MDD</b>              |                        |             |         |          |                      |     |     |              |
| R PHG (BA30)                                                     | .039                   | .010        | 1.115   | 4.07**   | 28                   | -52 | 4   | 17           |
| <b>Predictor Variable: Interaction of TLE x OPC</b>              |                        |             |         |          |                      |     |     |              |
| L Caudate Head                                                   | .077                   | .016        | 1.375   | 4.81**   | -1                   | 17  | 2   | 20           |
| L Superior TG (BA38)                                             | .173                   | .039        | 1.224   | 4.46**   | -39                  | 17  | -28 | 21           |
| L Middle TG (BA39)                                               | .038                   | .009        | 1.215   | 4.17**   | -30                  | -64 | 25  | 20           |
| L Middle TG (BA21)                                               | .074                   | .018        | 1.230   | 4.21**   | -41                  | -3  | -7  | 19           |
| R PHG (BA30)                                                     | .046                   | .011        | 1.268   | 4.29**   | 27                   | -50 | 3   | 20           |

(Continue)

(Continued)

| Brain region                                        | Regression Coefficient |             |         |          | Talairach Coordinate |     |     | Cluster Size |
|-----------------------------------------------------|------------------------|-------------|---------|----------|----------------------|-----|-----|--------------|
|                                                     | <i>B</i>               | <i>SE B</i> | $\beta$ | <i>t</i> | X                    | Y   | Z   |              |
| <b>Predictor Variable: Interaction of TLE x OPC</b> |                        |             |         |          |                      |     |     |              |
| R Insula (BA13)                                     | .049                   | .012        | 1.209   | 4.22**   | 45                   | -33 | 24  | 18           |
| R Superior TG (BA38)                                | .138                   | .026        | 1.339   | 5.34**   | 32                   | 1   | -17 | 42           |
| R Superior TG (BA22)                                | .058                   | .012        | 1.317   | 4.69**   | 56                   | -25 | 6   | 60           |
| R Inferior TG (BA20)                                | .364                   | .081        | 1.223   | 4.50**   | 52                   | -11 | -30 | 29           |
| R Postcentral Gyrus (BA7)                           | .142                   | .031        | 1.184   | 4.54**   | 21                   | -52 | 69  | 19           |
| R Cuneus (BA19)                                     | .115                   | .028        | 1.112   | 4.08**   | 12                   | -85 | 37  | 48           |

Outcome Variable: Happy &gt; Neutral

| <b>Predictor Variable: Main Effect of Cumulative TLE</b> |      |      |      |        |     |     |     |     |
|----------------------------------------------------------|------|------|------|--------|-----|-----|-----|-----|
| L Medial FG (BA9)                                        | .027 | .006 | .613 | 4.26** | -3  | 50  | 20  | 28  |
| L Superior FG (BA6)                                      | .033 | .007 | .654 | 4.60** | -2  | 19  | 60  | 24  |
| L Superior TG (BA38)                                     | .095 | .017 | .754 | 5.55** | -37 | 12  | -29 | 192 |
| L Superior TG (BA22)                                     | .075 | .011 | .857 | 6.79** | -59 | 1   | -4  | 32  |
| L Superior TG (BA42)                                     | .038 | .007 | .773 | 5.69** | -63 | -28 | 8   | 37  |
| L Angular Gyrus (BA39)                                   | .037 | .008 | .638 | 4.46** | -54 | -63 | 31  | 32  |
| L Precentral Gyrus (BA43)                                | .029 | .007 | .608 | 4.23** | -58 | -9  | 13  | 19  |
| L Superior PL (BA7)                                      | .038 | .009 | .586 | 4.29** | -27 | -50 | 65  | 18  |
| L Middle OG (BA18)                                       | .022 | .005 | .635 | 4.43** | -26 | -95 | 4   | 18  |
| L Red Nucleus                                            | .051 | .011 | .684 | 4.86** | -2  | -18 | -13 | 56  |
| L Lateral Geniculum Body                                 | .033 | .008 | .574 | 3.99** | -21 | -21 | -4  | 19  |
| L Cerebellum (Tuber)                                     | .099 | .018 | .742 | 5.37** | -48 | -69 | -24 | 36  |
| L Cerebellum                                             | .040 | .009 | .608 | 4.32** | -2  | -82 | -24 | 24  |
| R Middle FG (BA6)                                        | .037 | .007 | .754 | 5.53** | 31  | -2  | 61  | 42  |
| R Superior TG (BA41)                                     | .020 | .003 | .803 | 5.98** | 53  | -26 | 6   | 216 |
| R Inferior TG (BA20)                                     | .111 | .021 | .724 | 5.35** | 37  | -19 | -33 | 20  |
| R Inferior TG (BA20)                                     | .058 | .009 | .816 | 6.19** | 48  | -11 | -20 | 279 |
| R Precentral Gyrus (BA6)                                 | .025 | .005 | .692 | 4.94** | 47  | -6  | 49  | 40  |
| R Postcentral Gyrus (BA3)                                | .071 | .014 | .668 | 4.97** | 15  | -40 | 71  | 70  |
| R Postcentral Gyrus (BA5)                                | .031 | .006 | .751 | 5.60** | 31  | -44 | 63  | 84  |
| R Inferior PL (BA40)                                     | .018 | .003 | .831 | 6.20** | 48  | -44 | 25  | 126 |
| R Cuneus (BA19)                                          | .040 | .008 | .688 | 4.98** | 11  | -86 | 37  | 81  |
| R Lingual Gyrus (BA17)                                   | .032 | .007 | .665 | 4.75** | 10  | -92 | 0   | 63  |
| R Middle OG (BA19)                                       | .012 | .003 | .600 | 4.18** | 38  | -66 | 14  | 46  |
| R Cerebellum (Declive)                                   | .072 | .016 | .635 | 4.47** | 31  | -85 | -19 | 17  |
| R Cerebellum (Tonsil)                                    | .044 | .010 | .619 | 4.30** | 43  | -55 | -46 | 18  |

Predictor Variable: Main Effect of MDD  
No Main Effect

| <b>Predictor Variable: Main Effect of OPC</b> |        |      |       |        |     |   |     |    |
|-----------------------------------------------|--------|------|-------|--------|-----|---|-----|----|
| L Middle TG (BA21)                            | -1.154 | .267 | -.661 | 4.32** | -40 | 9 | -31 | 68 |

(Continue)



(Continued)

| Brain region                                        | Regression Coefficient |             |         |          | Talairach Coordinate |     |     | Cluster Size |
|-----------------------------------------------------|------------------------|-------------|---------|----------|----------------------|-----|-----|--------------|
|                                                     | <i>B</i>               | <i>SE B</i> | $\beta$ | <i>t</i> | X                    | Y   | Z   |              |
| <b>Predictor Variable: Main Effect of OPC</b>       |                        |             |         |          |                      |     |     |              |
| <b>L Middle TG (BA21)</b>                           | -.942                  | .150        | -.907   | 6.26**   | -59                  | -1  | -6  | 51           |
| <b>R Inferior FG (BA47)</b>                         | -.163                  | .038        | -.590   | 4.34**   | 16                   | 19  | -20 | 18           |
| <b>R Fusiform Gyrus (BA20)</b>                      | .048                   | .012        | .590    | 4.17**   | 45                   | -4  | -23 | 54           |
| <b>R Postcentral Gyrus (BA3)</b>                    | -1.319                 | .270        | -.754   | 4.89**   | 15                   | -40 | 72  | 93           |
| <b>R Postcentral Gyrus (BA7)</b>                    | -.616                  | .110        | -.832   | 5.59**   | 25                   | -48 | 65  | 73           |
| <b>R Cuneus (BA19)</b>                              | -.557                  | .134        | -.642   | 4.15**   | 10                   | -86 | 37  | 44           |
| <b>R Lingual Gyrus (BA17)</b>                       | -.553                  | .126        | -.693   | 4.40**   | 9                    | -95 | -2  | 42           |
| <b>Predictor Variable: Interaction of TLE x MDD</b> |                        |             |         |          |                      |     |     |              |
| <b>No Interaction Effect</b>                        |                        |             |         |          |                      |     |     |              |
| <b>Predictor Variable: Interaction of TLE x OPC</b> |                        |             |         |          |                      |     |     |              |
| <b>R Fusiform Gyrus (BA20)</b>                      | .122                   | .032        | 1.081   | 3.75**   | 45                   | -9  | -22 | 33           |
| <b>R Middle TG</b>                                  | .060                   | .013        | 1.265   | 4.48**   | 53                   | -32 | 2   | 34           |
| <b>R Lingual Gyrus (BA17)</b>                       | .060                   | .015        | 1.136   | 3.88**   | 12                   | -93 | 1   | 22           |

Note: Threshold of  $z = 3.0$  at  $p < .0026$  and 17 voxels. Multivariate outliers were not assessed. ACC = anterior cingulate cortex; *B* = unstandardized coefficient;  $\beta$  = standardized coefficient; BA = Brodmann area; DLPFC = dorsolateral prefrontal cortex; FG = frontal gyrus; GP = globus pallidus; ISL = inferior semilunar lobule; L = left hemisphere; OG = occipital gyrus; PFC = prefrontal cortex; PL = parietal lobule; R = right hemisphere; *SE B* = standard error of *B*; TG = temporal gyrus.

\* $p < .05$ ; \*\* $p < .01$
