# Supplementary material
Source: PubMed Central journal article supplement (PMC4086855)
Supplement: NIHMS597083-supplement-03.pdf [file NIHMS597083-supplement-03.pdf]

**Paper Descriptions For Published, In Press and Submitted Papers From the Preschool Depression Imaging Projects**

| Paper                                                                                                                                                                                                                                                                                           | Status    | Sample      | Ages | Diagnostic/Clinical data used                                                                                                                                                                                  | Data Type                                                                                  | Unique Contribution of Paper                                                                                                                                                                                                                                                                        |
|-------------------------------------------------------------------------------------------------------------------------------------------------------------------------------------------------------------------------------------------------------------------------------------------------|-----------|-------------|------|----------------------------------------------------------------------------------------------------------------------------------------------------------------------------------------------------------------|--------------------------------------------------------------------------------------------|-----------------------------------------------------------------------------------------------------------------------------------------------------------------------------------------------------------------------------------------------------------------------------------------------------|
| 1) Gaffrey, M. S., Luby, J. L., Repovs, G., Belden, A. C., Botteron, K., Luking, K., & Barch, D. M. (2010). Subgenual cingulate connectivity in children with a history of preschool-onset depression. <i>Neuroreport</i> , 21, 1182-8.                                                         | Published | PDS-Imaging | 7-12 | Historical data from first 3 annual waves of the initial Preschool Depression Study (PDS-I) – a federally funded grant examining the nosology and presentation of preschool depression (non-imaging)           | Resting State Functional Connectivity                                                      | First paper in this sample to examine resting state connectivity in children with a <u>history</u> of preschool onset depression. The focus on subgenual cingulate connectivity                                                                                                                     |
| 2) Luking, K. R., Repovs, G., Gaffrey, M. S., Belden, A. C., Botteron, K. N., Luby, J. L., & Barch, D. M. (2011). Functional connectivity of the amygdala in preschool onset depression. <i>Journal of the American Academy of Child and Adolescent Psychiatry</i> , 50, 1027-1041.             | Published | PDS-Imaging | 7-12 | Historical data from first 3 annual waves of the initial Preschool Depression Study (PDS-I)                                                                                                                    | Resting State Functional Connectivity                                                      | Examines children <u>at risk</u> for depression as well as children with a <u>history</u> of depression. Focus on networks that show positive and negative connectivity with the amygdala                                                                                                           |
| 3) Gaffrey, M. S., Luby, J. L., Botteron, K., Repovs, G., & Barch, D. M. (2012). Default mode network connectivity in children with a history of preschool onset depression. <i>Journal of the Academy of Child Psychiatry</i> , 9, 964-972.                                                    | Published | PDS-Imaging | 7-12 | Historical and current data from PDS-I and its subsequent renewal PDS-II. PDS-II overlaps with our imaging study and provides the diagnostic, clinical, and behavioral data that is concurrent with each scan. | Resting State Functional Connectivity                                                      | Examines Default Mode Network functional connectivity in children with a <u>history</u> of preschool depression using the posterior cingulate as a seed region. First resting state paper from our group to use <u>both historical and current diagnostic/clinical data</u> in design and analysis. |
| 4) Barch, D. M., Gaffrey, M. S., Botteron, K. N., Belden, A. C., & Luby, J. L. (2012). Functional brain activation to emotionally valenced faces in school aged children with a history of preschool onset depression. <i>Biological Psychiatry</i> , 12, 1035-1042.                            | Published | PDS-Imaging | 7-12 | Historical and current data from PDS-I and its subsequent renewal PDS-II.                                                                                                                                      | Task-related functional activity during face view (sad, fearful, angry, happy and neutral) | First paper in this sample to examine task-related functional brain activity (to emotional and neutral faces) in children with a <u>history</u> of preschool onset depression                                                                                                                       |
| 5) Pagliaccio, D., Luby, J., Gaffrey, M., Belden, A., Botteron, K., Gotlib, I. H., Barch, D. M. (2012). Anomalous functional brain activation following negative mood induction in children with pre-school onset major depression. <i>Developmental Cognitive Neuroscience</i> , 2, 256-267    | Published | PDS-Imaging | 7-12 | Historical data from first 3 annual waves of the initial Preschool Depression Study (PDS-I)                                                                                                                    | Functional brain activity during emotion regulation paradigm (mood elaboration)            | First paper in this sample to examine functional brain activity during emotion regulation in children with a <u>history</u> of preschool onset depression                                                                                                                                           |
| 6) Luby, J. L., Barch, D. M., Belden, A., Gaffrey, M., Tillman, R., Babb, C., Nishino, T., Suzuki, H., and Botteron, K. (2012). Maternal support in early childhood predicts larger hippocampal volumes at school age. <i>Proceedings of the National Academy of Sciences</i> , 109, 2854-2859. | Published | PDS-Imaging | 7-12 | Historical and current data from PDS-I and its subsequent renewal PDS-II.                                                                                                                                      | Observational maternal support measures and hippocampal volume                             | First paper in this sample to examine the influence of observationally rated maternal support measures obtained early in childhood on hippocampal volumes at school age.                                                                                                                            |
| 7) Suzuki, H., Botteron, K. N., Luby, J. L., Belden, A. C., Gaffrey, M. S., Babb, C. M., Nishino, T., Miller, M. I., Ratnanather, J. T., Barch, D. M. (2013). Structural-                                                                                                                       | Published | PDS-Imaging | 7-12 | Historical and current data from PDS-I and its subsequent renewal PDS-II.                                                                                                                                      | Task-related functional activity during face viewing                                       | First paper in this sample to examine the relationship between hippocampal volume and functional brain activation to negative faces.                                                                                                                                                                |

|                                        |                                                                                                                                                                                                                                                                                                                     |           |                      |      |                                                                                                  |                                                                                                                                                                                                                                                                                                                             |
|----------------------------------------|---------------------------------------------------------------------------------------------------------------------------------------------------------------------------------------------------------------------------------------------------------------------------------------------------------------------|-----------|----------------------|------|--------------------------------------------------------------------------------------------------|-----------------------------------------------------------------------------------------------------------------------------------------------------------------------------------------------------------------------------------------------------------------------------------------------------------------------------|
| 1<br>2<br>3<br>4                       | functional correlations between hippocampal volume and cortico-limbic emotional responses in depressed children. <i>Cognitive, Affective and Behavioral Neuroscience</i> , 13, 135-151.                                                                                                                             |           |                      |      | (sad, fearful, and neutral) & hippocampal volume                                                 |                                                                                                                                                                                                                                                                                                                             |
| 5<br>6<br>7<br>8<br>9<br>10            | 8) Luby, J. L., Belden, A., Botteron, K., Marrus, N., Harms, M. P., Babb, C., Nishino, T., & Barch, D. M. (in press). The effects of poverty on childhood brain development: The mediating effect of caregiving and stressful life events. <i>JAMA: Pediatrics</i> .                                                | In press  | PDS-Imaging          | 7-12 | Historical and current data from PDS-I and its subsequent renewal PDS-II.                        | Hippocampal volume<br>First paper in this sample to examine the effects of poverty on hippocampal and amygdala brain volumes, and how the effects of poverty might be mediated by caregiving and life events. Used the entire sample, and results were not specific to children with current or past psychiatric disorders. |
| 11<br>12<br>13<br>14<br>15             | 9) Pagliaccio, D., Luby, J., Gaffrey, M., Belden, A., Botteron, K., Harms, M. P. & Barch, D. M. (in press). Amygdala activation to emotion and non-emotional faces in school age children. <i>Cognitive, Affective and Behavioral Neuroscience</i> .                                                                | In press  | PDS-Imaging          | 7-12 | HEALTHY CHILDREN ONLY: Historical and current data from PDS-I and its subsequent renewal PDS-II. | Task-related functional activity during face viewing (sad, fearful, angry, happy & neutral)<br>Examined normative responses in the amygdala to both positive and negative emotional faces in healthy children.                                                                                                              |
| 16<br>17<br>18<br>19<br>20             | 10) Gaffrey, M. S., Luby, J. L., Singer, J., Power, J., Petersen, S. E., & Barch, D. M. (submitted). Altered amygdala functional connectivity in very early childhood depression.                                                                                                                                   | submitted | New Preschool Sample | 4-6  | Current data from new imaging study of depressed and healthy preschoolers                        | Resting State Functional Connectivity<br>First paper in this sample to examine functional brain connectivity in preschoolers with current depression.                                                                                                                                                                       |
| 21<br>22<br>23<br>24<br>25<br>26<br>27 | 11) Pagliaccio, D., Luby, J. L., Bogdan, R., Agarwal, A., Gaffrey, M. S., Belden, A. C., Botteron, K. N., Harms, M. P., & Barch, D. M. (submitted). Stress system genetic variation and early life stress predict cortisol levels in preschool age children and left amygdala and hippocampal volume at school age. | submitted | PDS-Imaging          | 7-12 | Historical and current data from PDS-I and its subsequent renewal PDS-II.                        | Hippocampal and amygdala volume<br>First paper in this sample to examine the influence of genes modulating the HPA axis on brain volume (hippocampus and amygdala as well as whole brain volume).                                                                                                                           |
| 28<br>29<br>30<br>31<br>32<br>33       | 12) Sylvester, C. M., Barch, D. M., Corbetta, M., Power, J. D., Schlaggar, B. L., & Luby, J. (in submission). Resting state functional connectivity of the ventral attention network in children with a history of depression or anxiety.                                                                           | submitted | PDS-Imaging          | 7-12 | Historical and current data from PDS-I and its subsequent renewal PDS-II.                        | Resting State Functional Connectivity<br>First paper in this sample to examine the similarities and differences between children with anxiety versus depression in functional brain connectivity. First paper in this sample to focus on the ventral attention network.                                                     |

34  
35  
36  
37  
38  
39  
40  
41  
42  
43  
44  
45  
46  
47  
48  
49
